# Supplementary material for: Catalytic pyrolysis of microalgae for production of aromatics and ammonia
Source: Royal Society of Chemistry journal article supplement (doi:10.1039/c3gc00031a), 2013-01-01
Supplement: c3gc00031a.pdf [file c3gc00031a.pdf]

**Electronic Supplementary Information for**

**Catalytic pyrolysis of microalgae for production of aromatics and ammonia**

Kaige Wang and Robert C. Brown

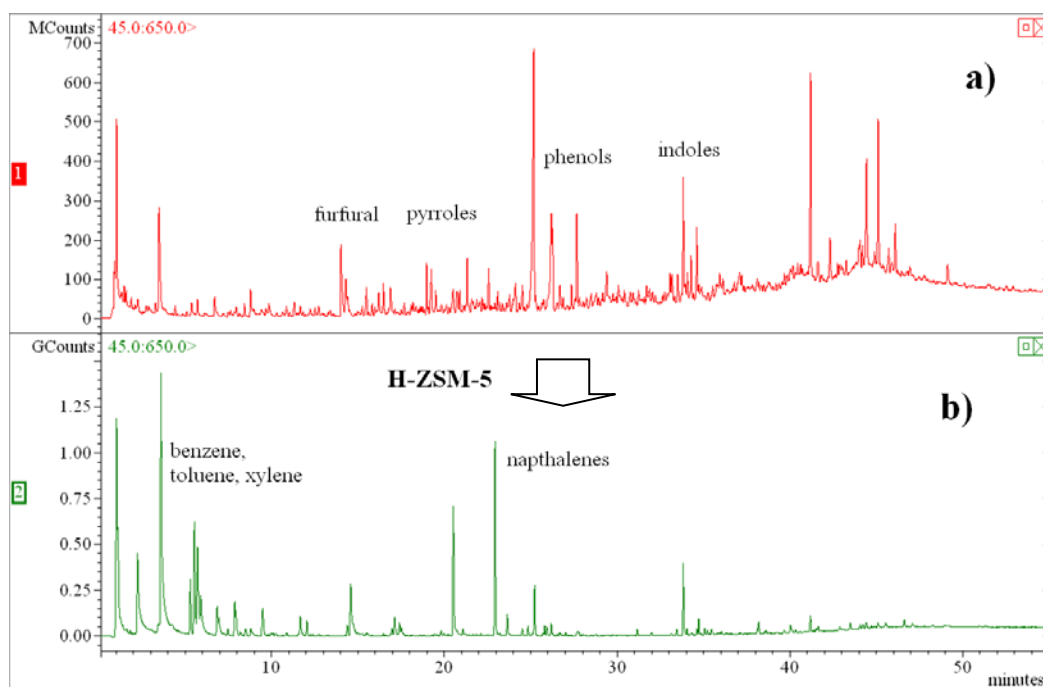

**Figure S 1:** Gas chromatographs of a) direct pyrolysis of *C.vulgaris* at 700°C and b) catalytic pyrolysis of *C.vulgaris* at 700°C using HZSM-5 and a catalyst-to-biomass ratio of 20.

**Pyrolysis products identification**

GC/MS chromatograph from direct pyrolysis of *C.vulgaris* was shown in Figure S1a. The major compounds were identified by mass spectra comparison with the NIST library and listed in Table S 1.

Table S 1. Major compounds from pyrolysis of *C. vulgaris* at 700°C

| RT/min | Compounds                              | Formual                                        | Area <sup>*</sup> /% |
|--------|----------------------------------------|------------------------------------------------|----------------------|
| 2.371  | 2,5-dimethyl-furan                     | C <sub>6</sub> H <sub>8</sub> O                | 1.39                 |
| 3.429  | propanenitrile                         | C <sub>3</sub> H <sub>5</sub> N                | 0.54                 |
| 3.64   | toluene                                | C <sub>7</sub> H <sub>8</sub>                  | 4.72                 |
| 5.507  | Enthyl-benzene                         | C <sub>8</sub> H <sub>10</sub>                 | 1.15                 |
| 6.84   | pyridine                               | C <sub>5</sub> H <sub>5</sub> N                | 0.52                 |
| 8.549  | 4-methyl-pentanenitrile                | C <sub>6</sub> H <sub>11</sub> N               | 0.34                 |
| 8.9    | styrene                                | C <sub>8</sub> H <sub>8</sub>                  | 1.05                 |
| 14.181 | acetic acid                            | C <sub>2</sub> H <sub>4</sub> O <sub>2</sub>   | 1.58                 |
| 14.374 | furfural                               | C <sub>5</sub> H <sub>4</sub> O <sub>2</sub>   | 1.24                 |
| 15.597 | pyrrole                                | C <sub>4</sub> H <sub>5</sub> N                | 0.49                 |
| 16.57  | 2-methyl-1H-pyrrole                    | C <sub>5</sub> H <sub>7</sub> N                | 0.64                 |
| 16.968 | 3-methyl-1H-pyrrole                    | C <sub>5</sub> H <sub>7</sub> N                | 0.66                 |
| 17.018 | 5-methyl-2-Furancarboxaldehyde         | C <sub>6</sub> H <sub>6</sub> O <sub>2</sub>   | 0.35                 |
| 19.256 | 2,3,5-trimethyl-1H-Pyrrole             | C <sub>7</sub> H <sub>11</sub> N               | 0.43                 |
| 19.33  | 3,methyl-Pentanoic acid                | C <sub>6</sub> H <sub>12</sub> O <sub>2</sub>  | 0.68                 |
| 20.811 | 4-ethyl-2-methyl-Pyrrole               | C <sub>7</sub> H <sub>11</sub> N               | 0.48                 |
| 21.403 | acetamide                              | C <sub>2</sub> H <sub>5</sub> NO               | 1.47                 |
| 21.958 | 4-ethyl-2,3-dimethyl-pyrrole           | C <sub>8</sub> H <sub>13</sub> N               | 0.31                 |
| 24.611 | benzyl nitrile                         | C <sub>8</sub> H <sub>7</sub> N                | 0.86                 |
| 25.219 | 3,7,11,15-tetramethyl-2-hexadecen-1-ol | C <sub>20</sub> H <sub>40</sub> O              | 7.31                 |
| 25.738 | levoglucosenone                        | C <sub>6</sub> H <sub>6</sub> O <sub>3</sub>   | 0.72                 |
| 26.211 | 3,7,11,15-tetramethyl-2-hexadecen-1-ol | C <sub>20</sub> H <sub>40</sub> O              | 0.73                 |
| 26.272 | phenol                                 | C <sub>6</sub> H <sub>6</sub> O                | 1.39                 |
| 26.325 | 3,7,11,15-tetramethyl-2-hexadecen-1-ol | C <sub>20</sub> H <sub>40</sub> O              | 1.52                 |
| 26.778 | benzene propanenitrile                 | C <sub>9</sub> H <sub>9</sub> N                | 0.51                 |
| 27.746 | 4-methyl-phenol                        | C <sub>7</sub> H <sub>8</sub> O                | 2.12                 |
| 33.146 | picolinamide                           | C <sub>6</sub> H <sub>6</sub> N <sub>2</sub> O | 0.78                 |
| 33.693 | 3-pyridinol                            | C <sub>5</sub> H <sub>5</sub> NO               | 0.59                 |
| 33.922 | indole                                 | C <sub>8</sub> H <sub>7</sub> N                | 2.88                 |
| 34.356 | 2,5-pyrrolidinedione                   | C <sub>4</sub> H <sub>5</sub> NO <sub>2</sub>  | 1.18                 |
| 34.698 | 4-methyl-1H-indole                     | C <sub>9</sub> H <sub>9</sub> N                | 1.08                 |
| 41.226 | n-hexadecanoic acid                    | C <sub>16</sub> H <sub>32</sub> O <sub>2</sub> | 5.34                 |
| 41.648 | Z-11.hexadecenoic acid                 | C <sub>16</sub> H <sub>30</sub> O <sub>2</sub> | 1.09                 |
| 44.452 | Cis-vaccenic acid                      | C <sub>18</sub> H <sub>34</sub> O <sub>2</sub> | 5.4                  |
| 45.141 | 9,12-octadecadienoic acid (Z,Z)        | C <sub>18</sub> H <sub>32</sub> O <sub>2</sub> | 5.12                 |
| 46.137 | 9,12,15-octadecatrienoic acid (Z,Z,Z)  | C <sub>18</sub> H <sub>30</sub> O <sub>2</sub> | 0.89                 |
| 47.054 | levoglucosan                           | C <sub>6</sub> H <sub>10</sub> O <sub>5</sub>  | 1.29                 |

<sup>\*</sup>Based on peak area of GC chromatograph
